# Supplementary material for: Modeling and therapeutic targeting of inflammation-induced hepatic insulin resistance using human iPSC-derived hepatocytes and macrophages
Source: PubMed Central journal article supplement (PMC10318012; doi:10.1038/s41467-023-39311-w), 2023-07-03
Supplement: 41467_2023_39311_MOESM1_ESM.pdf [file 41467_2023_39311_MOESM1_ESM.pdf]

## **Supplementary information**

Modeling and therapeutic targeting of inflammation-induced hepatic insulin resistance using human iPSC-derived hepatocytes and macrophages

Marko Groeger, Koji Matsuo, Emad Heidary Arash, Ashley Pereira, Dounia Le Guillou, Cindy Pino, Kayque A. Telles-Silva, Jacquelyn J. Maher, Edward C. Hsiao, Holger Willenbring

1. Included in this file: Supplementary Figs. 1-8, Supplementary Tables 1-4
2. Additional information: Supplementary Data 1

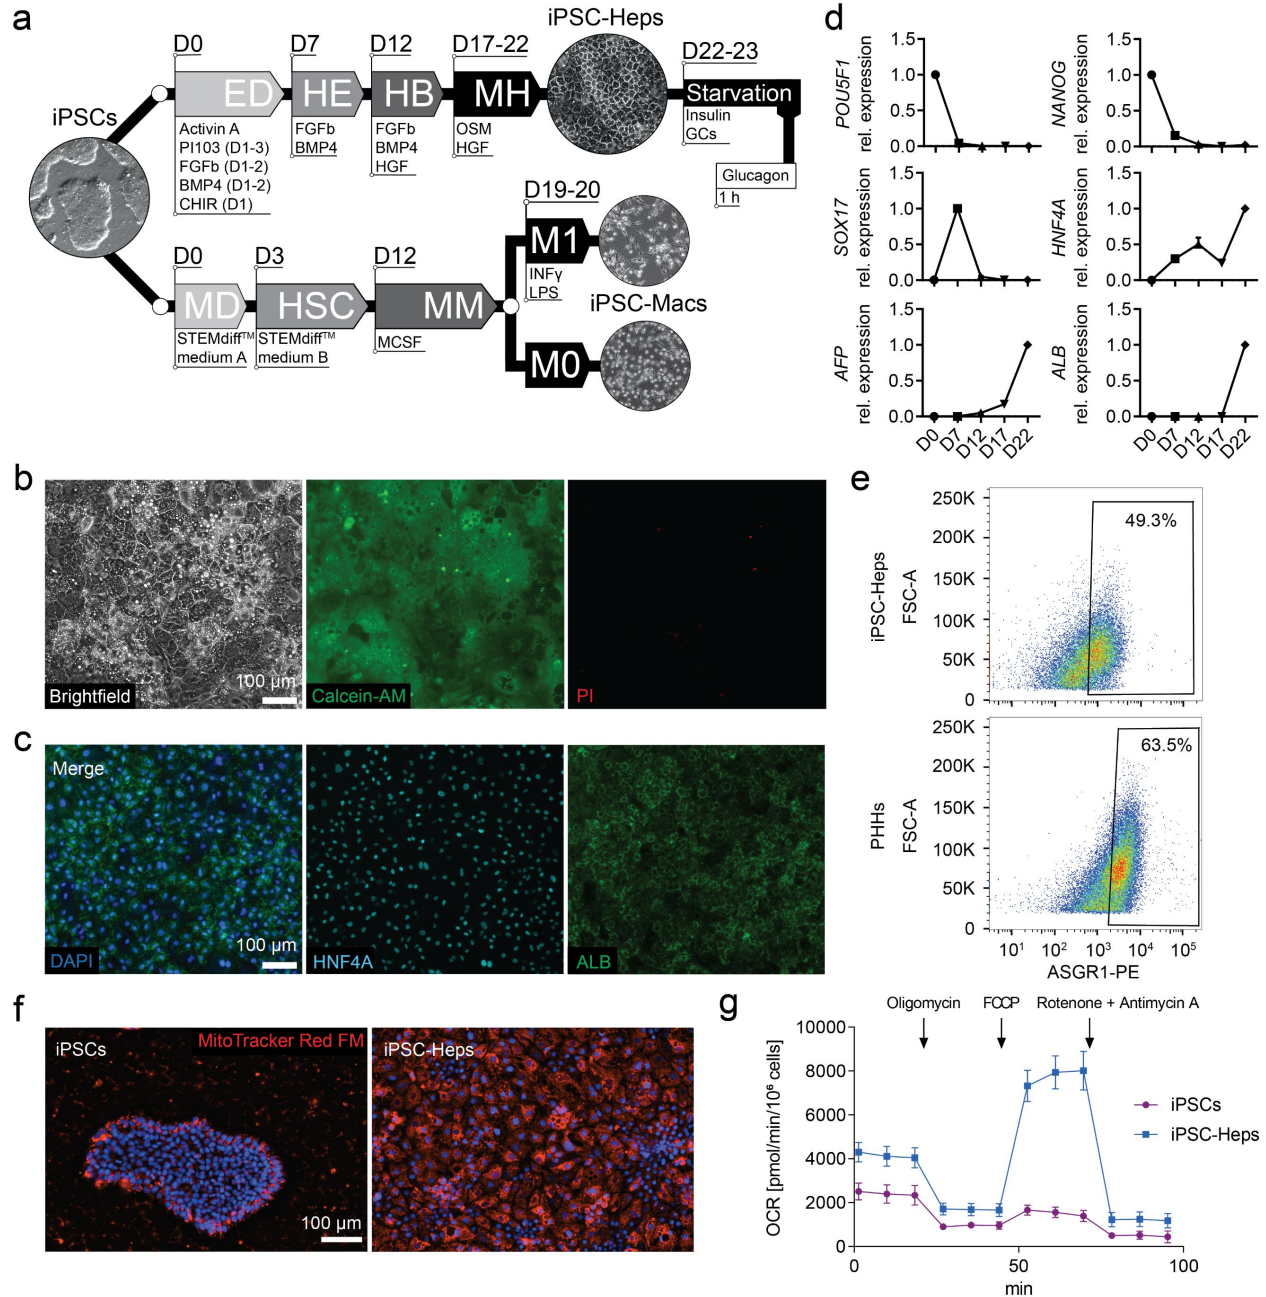

**Supplementary Fig. 1 | Generation of iPSC-Heps and iPSC-Macs.** **a** Overview of protocol for generation of iPSC-Heps and iPSC-Macs highlighting developmental stages and differentiation-promoting factors. D, day; ED, endoderm; HE, hepatic endoderm; HB, hepatoblast; MH, mature hepatocyte; MD, mesoderm; HSC, hematopoietic stem cell; MM, mature macrophage; GCs, glucocorticoids. **b** Representative live imaging of iPSC-Heps stained with the viability markers Calcein-AM (viable, green) and propidium iodide (PI; dead, red) at the end of the differentiation protocol.  $n = 3$ . **c** Representative immunofluorescence of HNF4A and albumin (ALB) in iPSC-Heps.  $n = 3$ . **d** Time course of gene expression analysis of pluripotency (*POU5F1*, *NANOG*), endoderm (*SOX17*) and hepatocyte (*HNF4A*, *AFP*, *ALB*) markers in iPSC-Heps. Data are mean  $\pm$  SD;  $n = 3$ . **e** Representative flow cytometry analysis of the hepatocyte differentiation marker ASGR1 in iPSC-Heps and freshly thawed PHHs. iPSC-Heps:  $n = 3$ , PHHs:  $n = 1$ . **f** Representative live imaging of mitochondria (MitoTracker Red FM) in iPSCs and iPSC-Heps.  $n$

= 3. **g** Mitochondrial respiration (oxygen consumption rate, OCR) in iPSCs and iPSC-Heps. Data are mean  $\pm$  SD; iPSCs: n = 4, iPSC-Heps: n = 10. Source data are provided as a Source Data file.

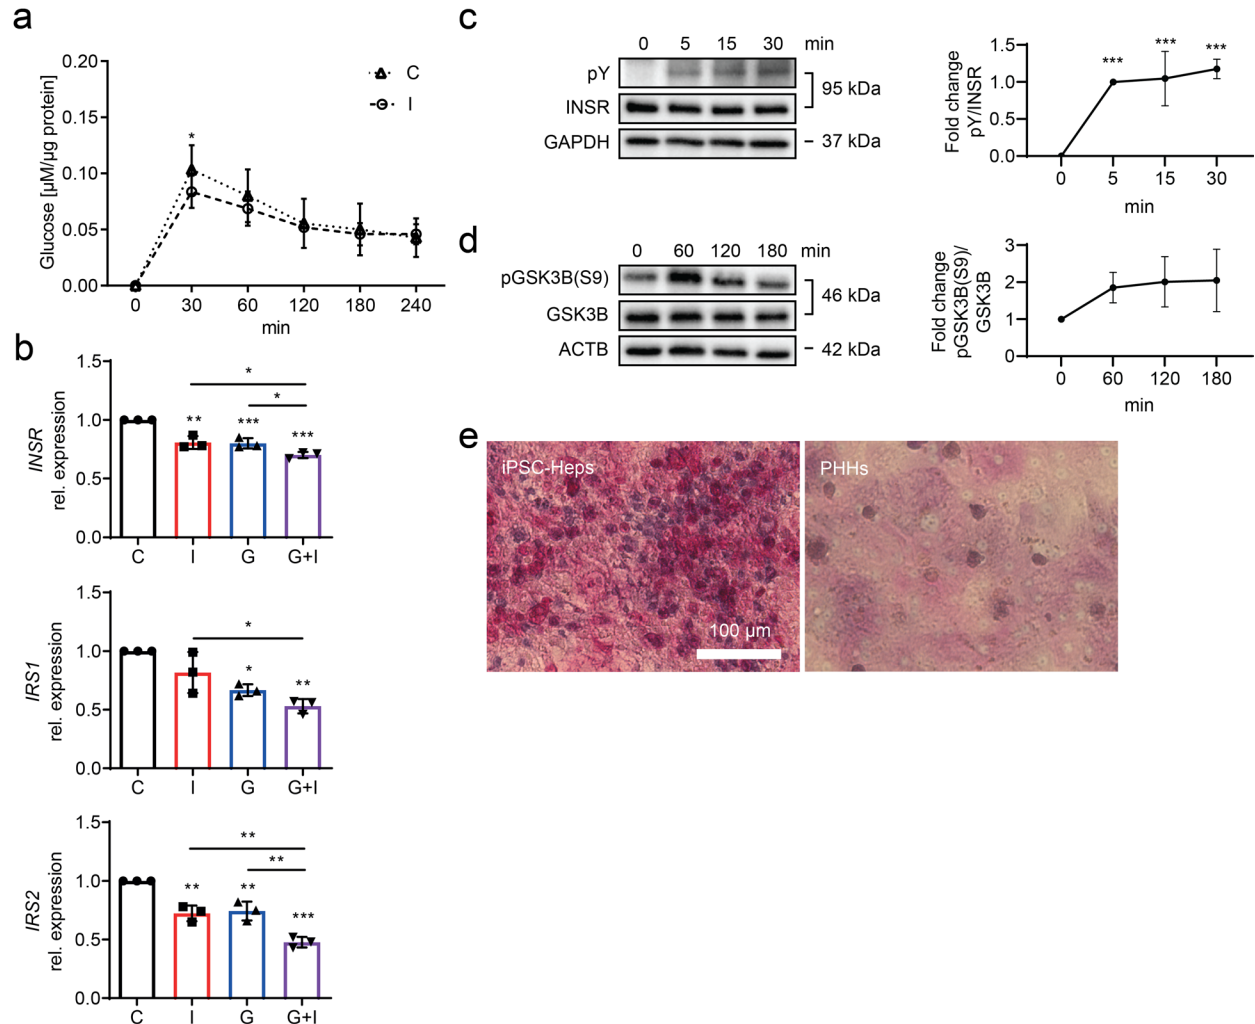

**Supplementary Fig. 2 | Insulin and glucagon effects on glucose metabolism in iPSC-Heps.** **a** Time course of analysis of glucose release by iPSC-Heps into glucose-free media after insulin (I) and no insulin (C, control). Data are mean  $\pm$  SD;  $n = 6$ , two-way ANOVA (two-stage step-up method of Benjamini, Krieger and Yekutieli),  $*P < 0.05$  vs. I at indicated timepoints. **b** Gene expression analysis in iPSC-Heps after 4 h of no hormones (C, control), insulin (I), glucagon (G) or 2 h of glucagon followed by 2 h of insulin (G+I). Data are mean  $\pm$  SD;  $n = 3$ , one-way ANOVA (Tukey's test),  $*P < 0.05$ ,  $**P < 0.01$  and  $***P < 0.001$  vs. C or between indicated conditions. **c** Time course of western blot analysis of INSR autophosphorylation in iPSC-Heps after insulin. Data are mean  $\pm$  SD;  $n = 3$ , one-way ANOVA (Dunnett's test),  $***P < 0.001$  vs. 0 min. **d** Time course of western blot analysis of GSK3B phosphorylation in iPSC-Heps after insulin. Data are mean  $\pm$  SD;  $n = 3$ , one-way ANOVA (Dunnett's test). **e** Representative Periodic Acid Schiff staining of iPSC-Heps at the end of the differentiation protocol and PHHs 48 h after plating (glycogen is red/pink, nuclei are purple/unstained).  $n = 3$ . Source data are provided as a Source Data file.

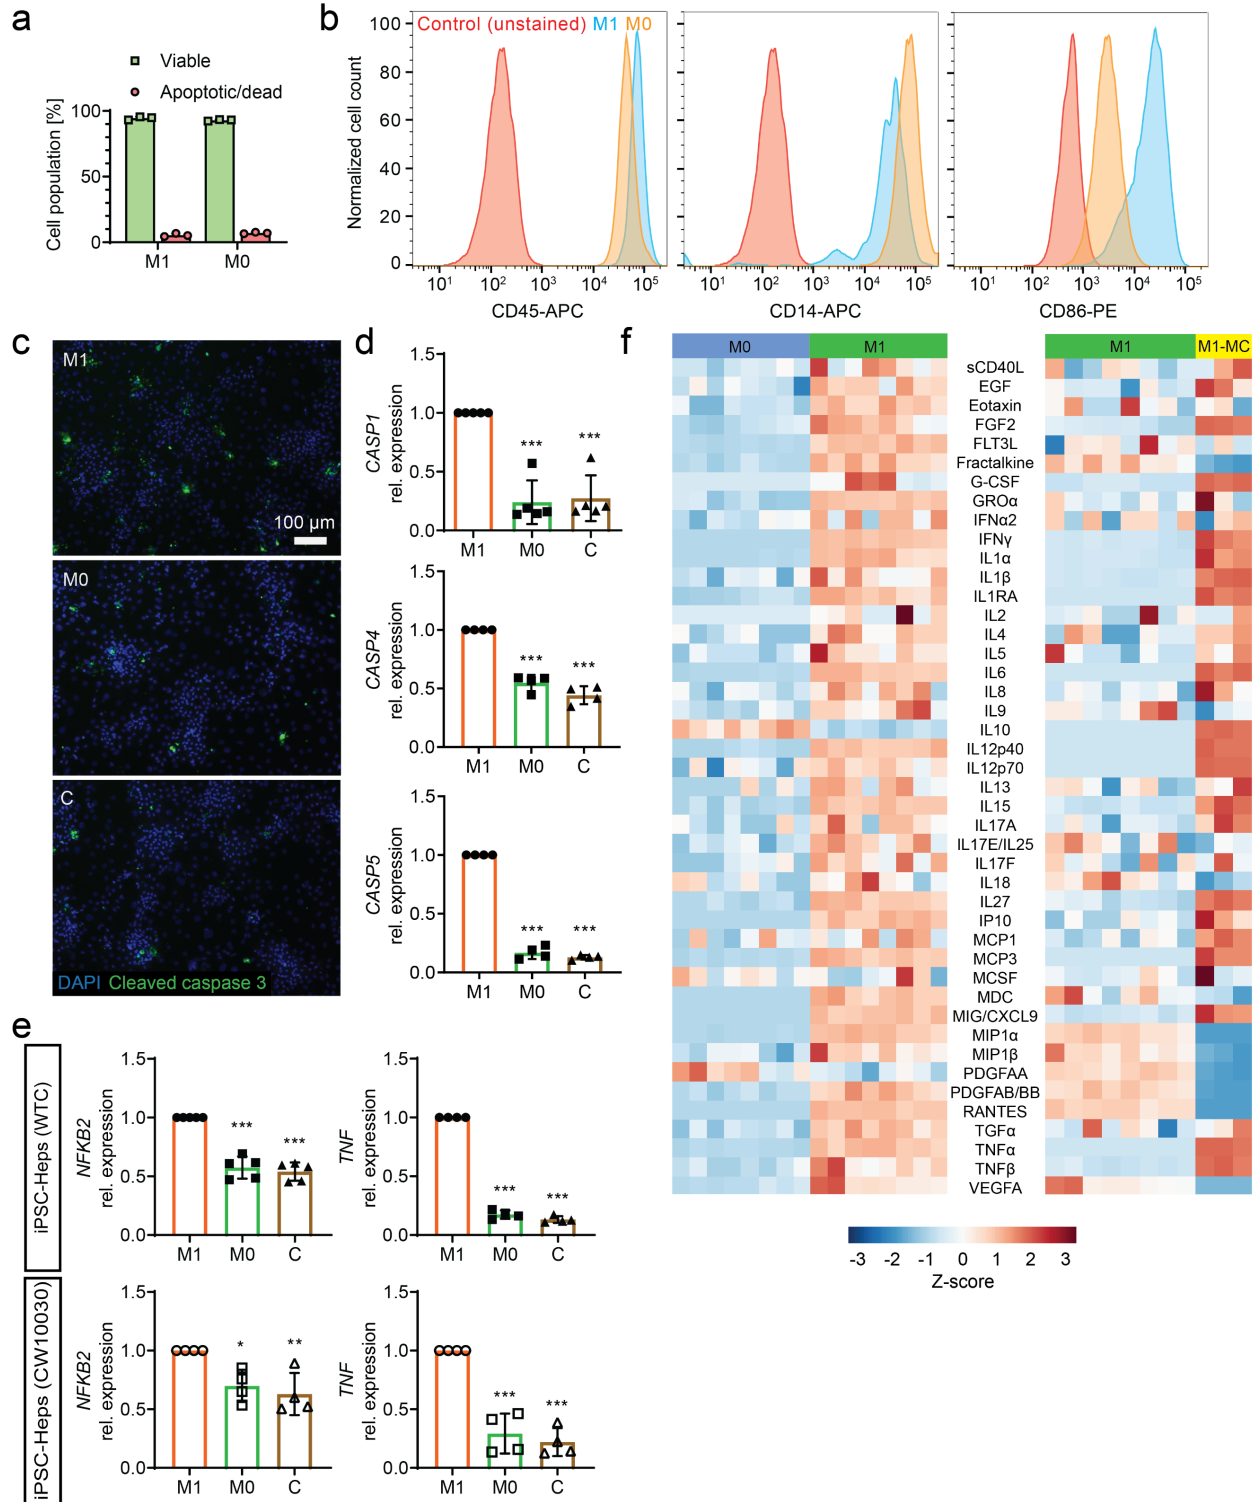

**Supplementary Fig. 3 | Inflammation of iPSC-Heps co-cultured with M1 or M0 iPSC-Macs.**  
**a, b** Flow cytometry analysis of viability (**a**) and hematopoietic (CD45) and monocytic (CD14) differentiation and macrophage polarization (CD86) markers (**b**) in M1 or M0 iPSC-Macs. Data are mean  $\pm$  SD;  $n = 3$ . **c-f** Representative immunofluorescence of cleaved caspase 3 particles in iPSC-Heps (**c**), caspase gene expression analysis in iPSC-Heps (*CASP1*:  $n = 5$ , *CASP4* and

*CASP5*: n = 4) (**d**), inflammatory gene expression analysis in WTC and CW10030 iPSC-Heps (WTC *NFKB2*: n = 5, WTC *TNF* and CW10030 *NFKB2* and *TNF*: n = 4) (**e**) and comparative analysis of cytokine and chemokine release into media (M0 and M1: n = 8, M1-MC: n = 3) (**f**) after 24-h co-culture of iPSC-Heps with M1 or M0 iPSC-Macs, in iPSC-Hep mono-culture (C, control) or in M1 iPSC-Mac monoculture (M1-MC). Data are mean  $\pm$  SD; one-way ANOVA (Dunnett's test), \**P* < 0.05, \*\**P* < 0.01, \*\*\**P* < 0.001 vs. M1. Source data are provided as a Source Data file.

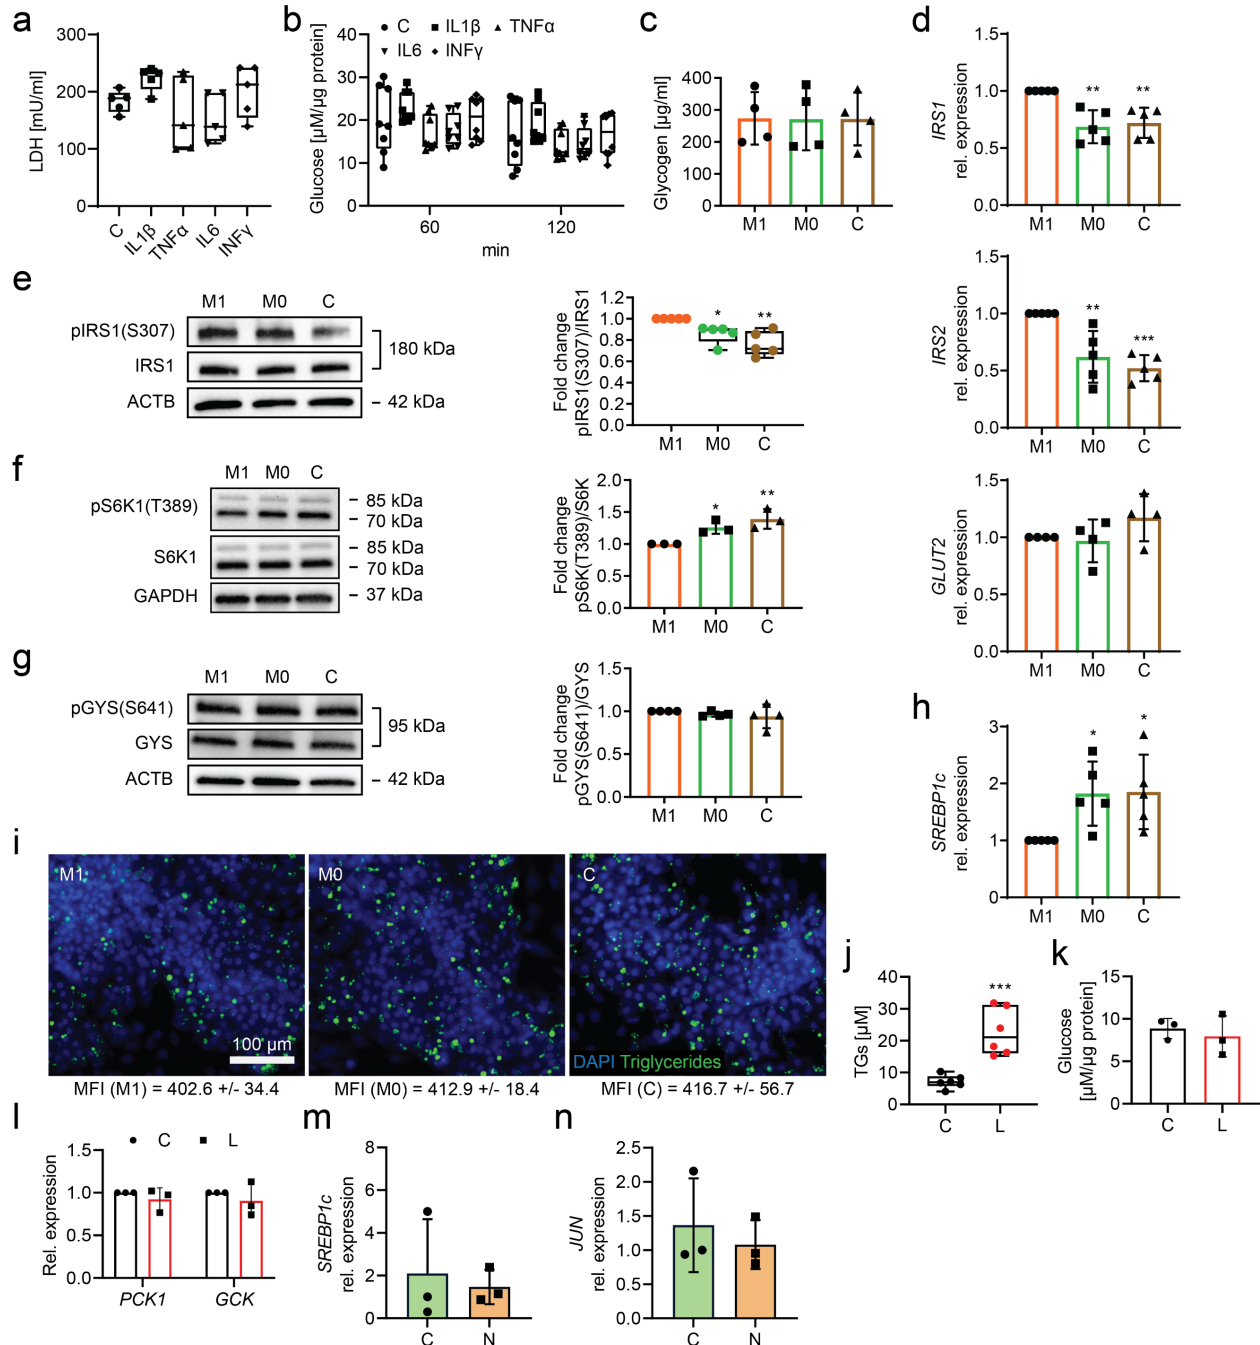

**Supplementary Fig. 4 | Glucose metabolism changes in iPSC-Heps co-cultured with M1 or M0 iPSC-Macs or accumulating lipid. a** Quantification of LDH release into media by iPSC-Heps treated with the indicated cytokines for 24 h. Data are mean  $\pm$  SD; n = 5. **b** Quantification of glucose release into 1 mM glucose-containing media 2 h after insulin by iPSC-Heps treated with the indicated cytokines for 24 h. Data are mean  $\pm$  SD; n = 8. **c** Quantification of glycogen in iPSC-Heps after 24-h co-culture of iPSC-Heps with M1 or M0 iPSC-Macs or in iPSC-Hep mono-culture (C, control). Data are mean  $\pm$  SD; n = 4, one-way ANOVA (Dunnett's test). **d-g** Gene expression analysis in iPSC-Heps 1 h after insulin (*IRS1* and *IRS2*: n = 5, *GLUT2*: n = 4) (**d**), western blot analysis in iPSC-Heps of IRS1 phosphorylation 5 min after insulin (n = 5) (**e**), western blot analysis in iPSC-Heps of S6K1 phosphorylation 30 min after insulin (n = 3) (**f**) and

western blot analysis in iPSC-Heps of GYS phosphorylation 2 h after insulin (n = 4) (**g**) after 24-h co-culture of iPSC-Heps with M1 or M0 iPSC-Macs or in iPSC-Hep mono-culture (C, control). Data are mean  $\pm$  SD; one-way ANOVA (Dunnett's test), \**P* < 0.05, \*\**P* < 0.01 and \*\*\**P* < 0.001 vs. M1. **h** Gene expression analysis in iPSC-Heps 1 h after insulin after 24-h co-culture of iPSC-Heps with M1 or M0 iPSC-Macs or in iPSC-Hep mono-culture (C, control). Data are mean  $\pm$  SD; n = 5, one-way ANOVA (Dunnett's test), \**P* < 0.05 vs. M1. **i** Representative triglyceride staining in iPSC-Heps after 24-h co-culture of iPSC-Heps with M1 or M0 iPSC-Macs or in iPSC-Hep mono-culture (C, control). MFI values are mean  $\pm$  SD; n = 3. MFI, mean fluorescence intensity of BODIPY 493/503. **j-l** Quantification of triglycerides (TGs) (n = 6) (**j**), quantification of glucose release into 1 mM glucose-containing media 2 h after insulin (n = 3) (**k**) and gene expression analysis 1 h after insulin (n = 3) (**l**) in iPSC-Heps after mono-culture without (C, control) or with 100  $\mu$ M oleate and 100  $\mu$ M palmitate (L, lipids) for 6 days. Data are mean  $\pm$  SD; unpaired two-tailed Student's t test, \*\*\**P* < 0.001 vs. C. **m, n** Gene expression analysis in iPSC-Heps 1 h after insulin (n = 3) (**m**) and at the end of the differentiation protocol (n = 3) (**n**) comparing iPSC-Heps from 3 healthy (C, control) and 3 NASH (N) patients. Data are mean  $\pm$  SD; unpaired two-tailed Student's t test. Source data are provided as a Source Data file.



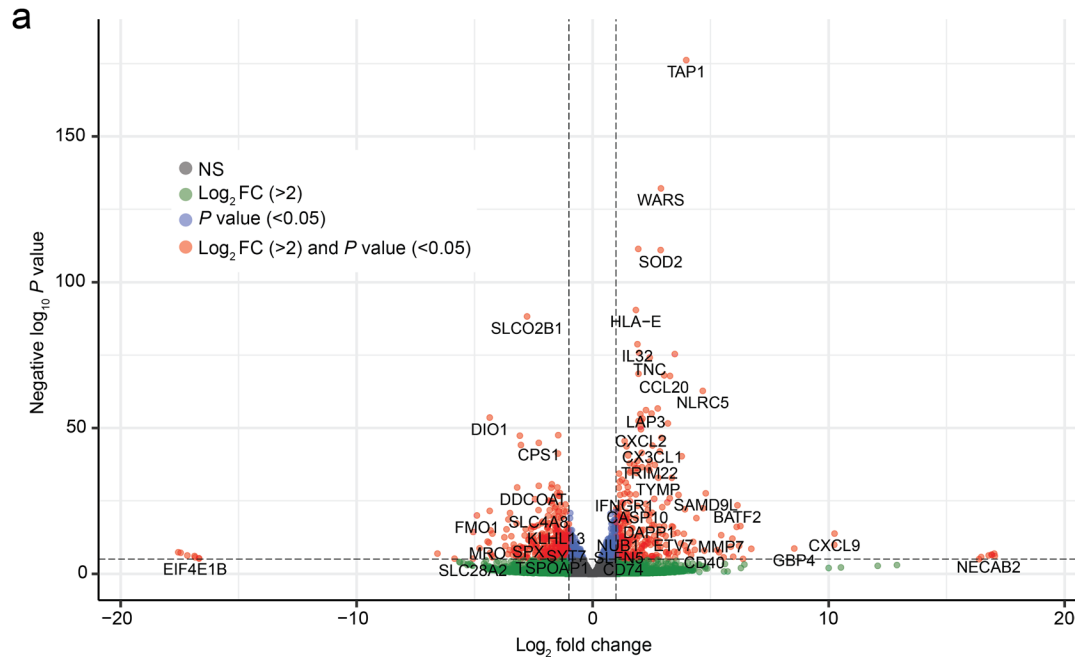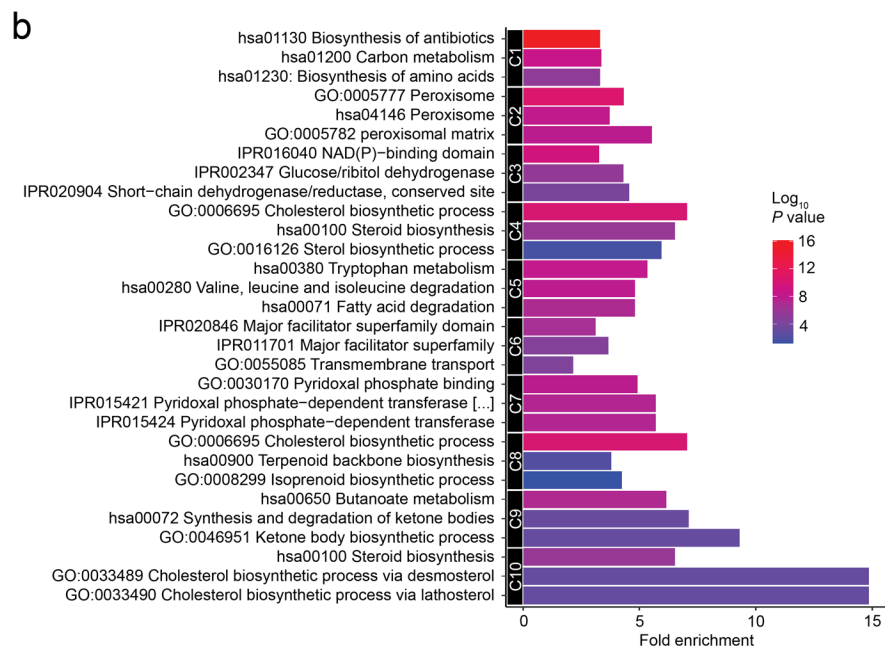

**Supplementary Fig. 5 | RNAseq analysis of iPSC-Heps co-cultured with M1 or M0 iPSC-Macs.** **a** Volcano plot of all differentially expressed genes with log<sub>2</sub> fold change > 2, *P* value < 0.05 or both in iPSC Heps co-cultured with M1 or M0 iPSC-Macs. Horizontal line indicates *P* value < 0.05 and vertical lines mark log<sub>2</sub> fold change of 2.0 and -2.0. *n* = 3, FDR-adjusted *P* value (*P* < 0.05) by Wald test. FC, fold change; NS, not significant. **b** Top 10 down-regulated pathway clusters enriched (Cluster Enrichment Score > 1.3) in the genes differentially expressed between iPSC Heps co-cultured with M1 or M0 iPSC-Macs identified using DAVID. Vertical axis represents enrichment fold values and horizontal axis shows the names of GO-BP, GO-MF and GO-CC terms and KEGG pathways. Node color indicates the enrichment significance, red represents higher significance. *n* = 3, FDR-adjusted *P* value (*P* < 0.05) by Wald test.

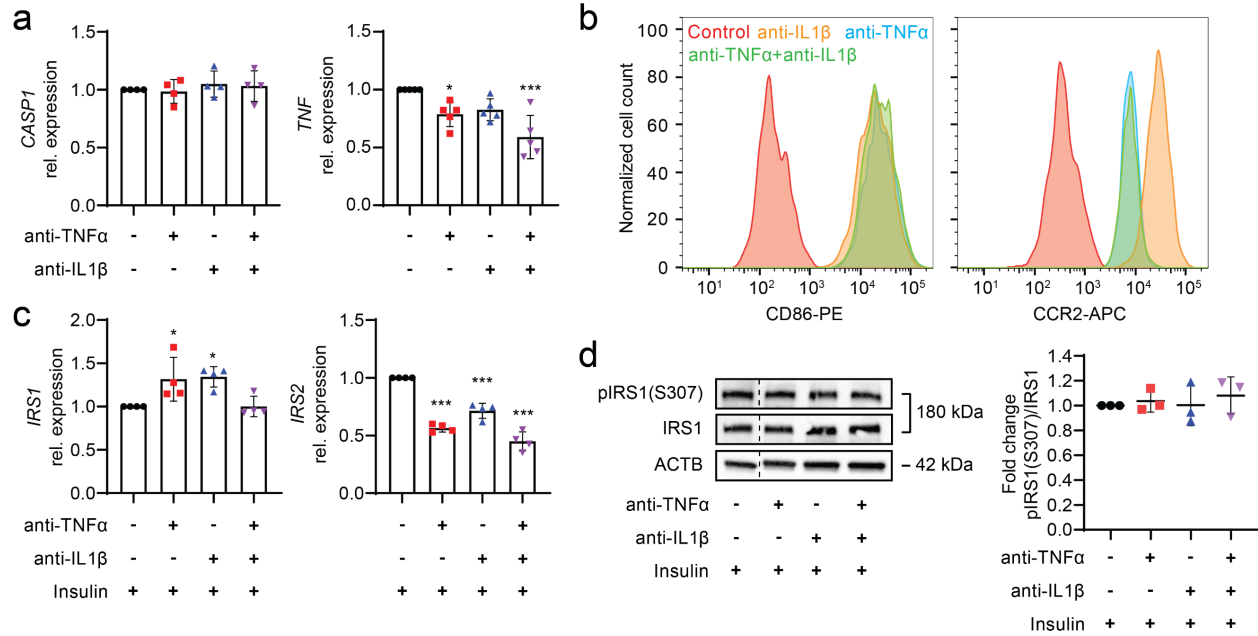

**Supplementary Fig. 6 | Effect of TNF $\alpha$  and/or IL1 $\beta$  neutralization on inflammation and glucose metabolism changes in iPSC-Heps co-cultured with M1 iPSC-Macs. a** Gene expression analysis in iPSC-Heps after 24-h co-culture with M1 iPSC-Macs and indicated antibody treatments. Data are mean  $\pm$  SD; *CASP1*: n = 4, *TNF*: n = 5, one-way ANOVA (Dunnett's test), \* $P$  < 0.05 and \*\*\* $P$  < 0.001 vs. no-antibody condition. **b** Flow cytometry analysis of CD86 and CCR2 in M1 iPSC-Macs after 24-h co-culture with iPSC-Heps and indicated antibody treatments. n = 3. **c, d** Gene expression analysis 1 h after insulin (n = 4) (**c**) and western blot analysis of IRS1 phosphorylation 5 min after insulin (n = 3) (**d**) in iPSC-Heps after 24-h co-culture with M1 iPSC-Macs and indicated antibody treatments. Data are mean  $\pm$  SD; one-way ANOVA (Dunnett's test), \* $P$  < 0.05 and \*\*\* $P$  < 0.001 vs. no-antibody condition. Source data are provided as a Source Data file.

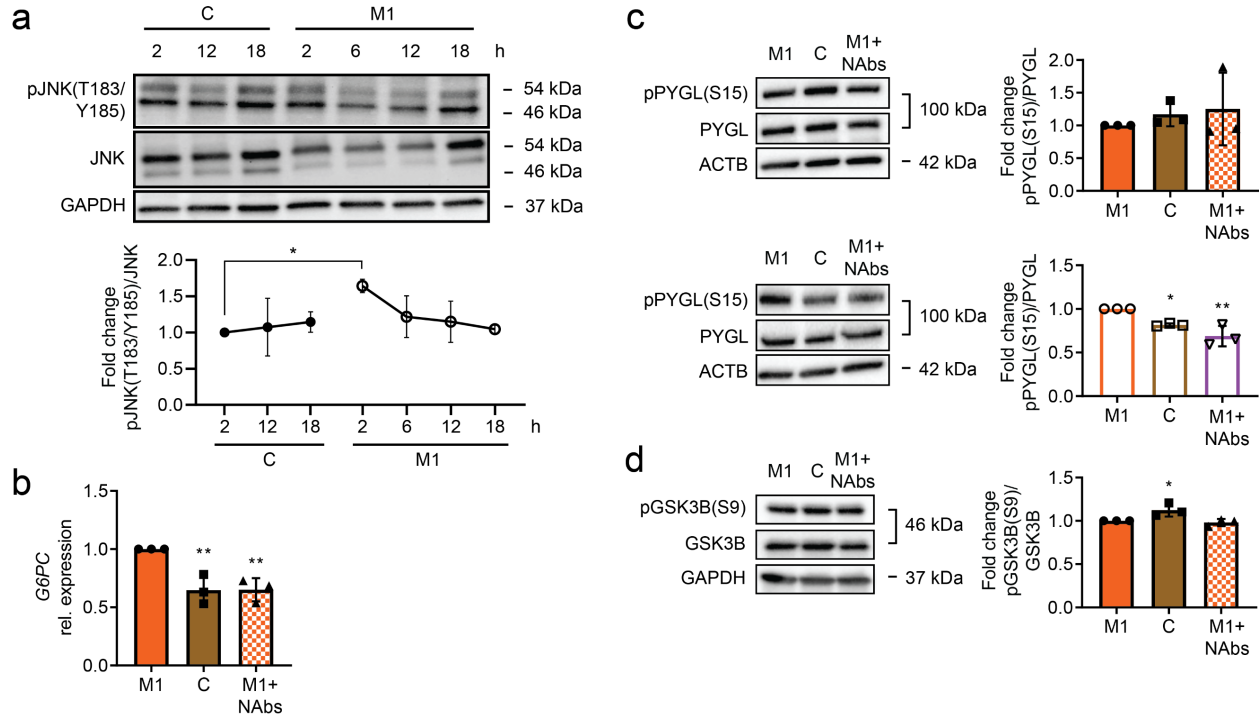

**Supplementary Fig. 7 | Effect of TNF $\alpha$  and/or IL1 $\beta$  neutralization on inflammation and glucose metabolism changes in PHHs co-cultured with M1 PHMs.** **a** Time course of western blot analysis of JNK phosphorylation in PHHs after co-culture with M1 PMHs or in PHH mono-culture (C, control). Data are mean  $\pm$  SD;  $n = 3$ , one-way ANOVA (Tukey's test),  $*P < 0.05$ . **b** Gene expression analysis 1 h after insulin after 24-h co-culture of PHHs with M1 or M0 PHMs or in PHH mono-culture (C, control). Data are mean  $\pm$  SD;  $n = 3$ , one-way ANOVA (Dunnett's test),  $**P < 0.01$  vs. M1. **c** Western blot analysis of PYGL phosphorylation 30 min after insulin in hepatocytes after 24-h co-culture with M1 macrophages or in hepatocyte mono-culture (C, control) or after 24-h co-culture with M1 macrophages including TNF $\alpha$  and IL1 $\beta$  neutralizing antibodies (M1+NABs). Primary cells, filled bars/symbols; CW10030 iPSC-derived cells, open bars/symbols. Data are mean  $\pm$  SD;  $n = 3$ , one-way ANOVA (Dunnett's test),  $*P < 0.05$  and  $**P < 0.01$  vs. M1. **d** Western blot analysis of GSK3B phosphorylation 30 min after insulin in PHHs after 24-h co-culture with M1 PMHs or in PHH mono-culture (C, control) or after 24-h co-culture with M1 PHMs including TNF $\alpha$  and IL1 $\beta$  neutralizing antibodies (M1+NABs). Data are mean  $\pm$  SD;  $n = 3$ , one-way ANOVA (Dunnett's test),  $*P < 0.05$ . Source data are provided as a source Data File.

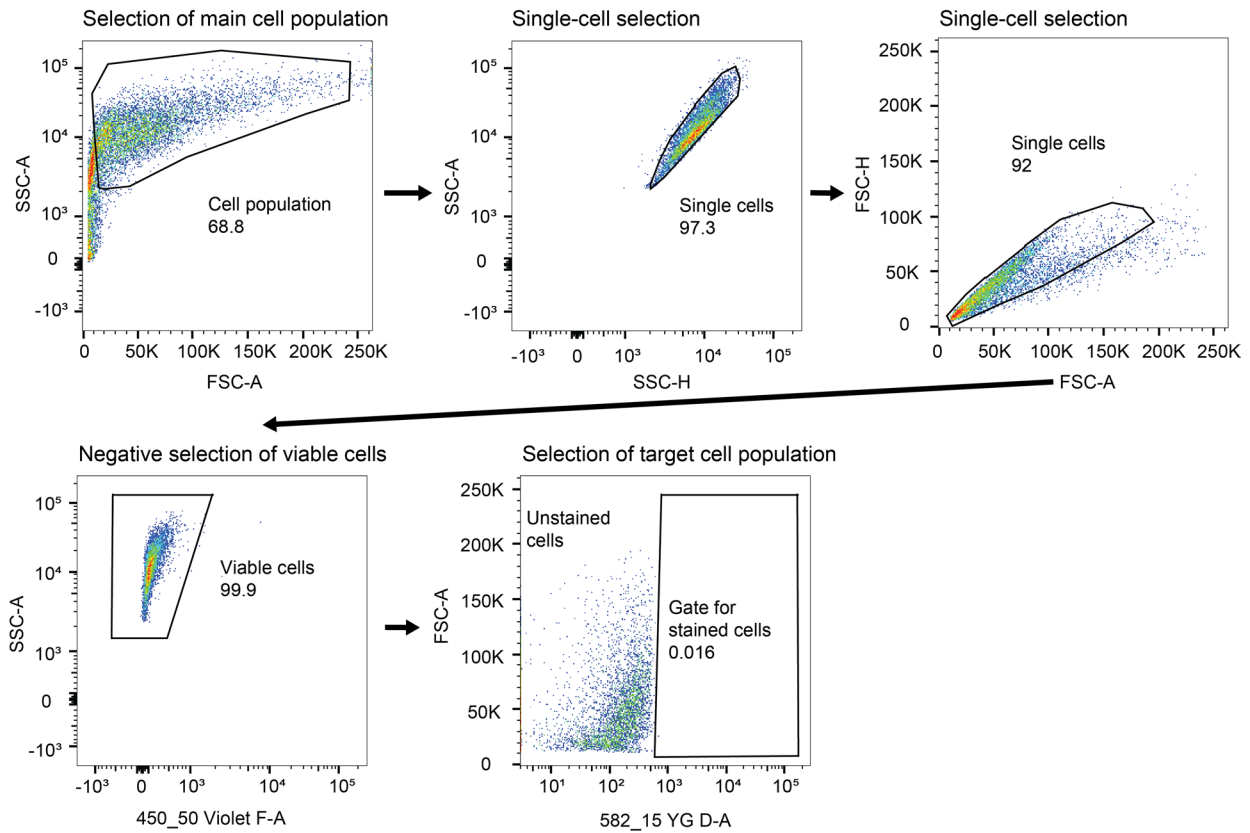

**Supplementary Fig. 8 | Gating strategy for flow cytometry analysis.** The main cell population was selected based on pulse area (-A) of forward scatter (FSC) and side scatter (SSC). Pulse height (-H) of FSC and SSC was used to select single cells from the main cell population. SYTOX green/red cell death staining was used to select viable cells. Gates for target cells expressing specific markers detected with fluorophore-conjugated antibodies were defined based on unstained cells. 450\_50 Violet F-A and 582\_15 YG D-A are flow cytometer-specific laser and filter set combinations for fluorophore detection.

**Supplementary Table 1 | Primers for qRT-PCR.**

| Gene           | Direction | Sequence                |
|----------------|-----------|-------------------------|
| <i>CASP1</i>   | Forward   | CTCAGGCTCAGAAGGGAATG    |
|                | Reverse   | ACGCTGTACCCCAGATTTTG    |
| <i>CASP4</i>   | Forward   | CAAGAGAAGCAACGTATGGCA   |
|                | Reverse   | AGGCAGATGGTCAAACCTCTGTA |
| <i>CASP5</i>   | Forward   | TTCAACACCACATAACGTGTCC  |
|                | Reverse   | GTCAAGGTTGCTCGTTCTATGG  |
| <i>G6PC</i>    | Forward   | ACTGGCTCAACCTCGTCTTTA   |
|                | Reverse   | CGGAAGTGTGCTGTAGTAGTCA  |
| <i>GCK</i>     | Forward   | CCGCAAGCAGATCTACAACA    |
|                | Reverse   | AGCTTGTACACGGAGCCATC    |
| <i>GLUT2</i>   | Forward   | TTGGTGTGATCAATGCACCT    |
|                | Reverse   | GCCACAGTCTCTTCCTCAGC    |
| <i>INSR</i>    | Forward   | CATCCGGGGATCACGACTG     |
|                | Reverse   | ATCAGGTTGTAGAGGCCGAGT   |
| <i>IRS1</i>    | Forward   | CAAGACCATCAGCTTCGTGA    |
|                | Reverse   | AGAGTCATCCACCTGCATCC    |
| <i>IRS2</i>    | Forward   | CGGTGAGTTCTACGGGTACAT   |
|                | Reverse   | TCAGGGTGTATTCATCCAGCG   |
| <i>NFKB2</i>   | Forward   | ATGGAGAGTTGCTACAACCCA   |
|                | Reverse   | CTGTTCCACGATCACCAGGTA   |
| <i>PCK1</i>    | Forward   | TCATTTAAGGGCCATCAACC    |
|                | Reverse   | CTCATCAATGCCTTCCCAGT    |
| <i>RPLP0</i>   | Forward   | GCAGATCCGCATGTCCCTT     |
|                | Reverse   | TGTTTTCCAGGTGCCCTCG     |
| <i>SREBP1c</i> | Forward   | CCATGGATTGCACTTTCGAA    |
|                | Reverse   | GGCCAGGGAAGTCACTGTCTT   |
| <i>TNF</i>     | Forward   | CCTCTCTCTAATCAGCCCTCTG  |
|                | Reverse   | GAGGACCTGGGAGTAGATGAG   |

**Supplementary Table 2 | Antibodies.**

| Antibody                                                            | Company                     | Catalogue #  | Dilution  |
|---------------------------------------------------------------------|-----------------------------|--------------|-----------|
| <b>Immunofluorescence</b>                                           |                             |              |           |
| Goat anti-Albumin                                                   | Bethyl Lab.                 | A80-229A     | 1:500     |
| Rabbit anti-Cleaved Caspase 3                                       | Cell Signaling              | 9661s        | 1:400     |
| Mouse anti-HNF4A                                                    | Abcam                       | ab41898      | 1:1,000   |
| Donkey anti-Goat IgG (H+L)<br>Secondary Antibody, Alexa Fluor 647   | Life Technologies           | A-21447      | 1:500     |
| Donkey anti-Mouse IgG (H+L)<br>Secondary Antibody, Alexa Fluor 555  | Life Technologies           | A-31570      | 1:500     |
| Donkey anti-Rabbit IgG (H+L)<br>Secondary Antibody, Alexa Fluor 488 | Life Technologies           | A-21206      | 1:500     |
| <b>Flow cytometry</b>                                               |                             |              |           |
| Mouse anti-ASGR1-PE                                                 | SinoBiological              | 10773-MM02-P | 5 µl/test |
| Mouse anti-CD14-APC                                                 | BD Biosciences              | 561383       | 5 µl/test |
| Mouse anti-CD45-APC                                                 | BD Biosciences              | 340943       | 5 µl/test |
| Mouse anti-CD86-PE                                                  | Biolegend                   | 374205       | 5 µl/test |
| Mouse anti-CD192(CCR2)-APC                                          | Biolegend                   | 357207       | 5 µl/test |
| <b>Western blotting</b>                                             |                             |              |           |
| Rabbit anti-AKT                                                     | Cell Signaling              | 9272s        | 1:1,000   |
| Rabbit anti-Phospho-AKT (Ser473)                                    | Cell Signaling              | 4060s        | 1:2,000   |
| Rabbit anti-Phospho-AKT (Thr308)                                    | Cell Signaling              | 4056s        | 1:1,000   |
| Rabbit anti-β-Actin (ACTB)                                          | Cell Signaling              | 4970S        | 1:5,000   |
| Mouse anti-GAPDH                                                    | Santa Cruz<br>Biotechnology | sc-47724     | 1:2,000   |
| Rabbit anti-Glycogen Synthase                                       | Cell Signaling              | 3886S        | 1:1,000   |
| Rabbit anti-Phospho-Glycogen<br>Synthase (Ser641)                   | Cell Signaling              | 47043T       | 1:1,000   |
| Rabbit anti-GSK3B                                                   | Cell Signaling              | 12456T       | 1:1,000   |
| Rabbit anti-Phospho-GSK3B (S9)                                      | Cell Signaling              | 5558T        | 1:1,000   |
| Rabbit anti-Insulin receptor (IR) β                                 | Cell Signaling              | 23413t       | 1:1,000   |
| Mouse anti-Phospho-Y                                                | Cell Signaling              | 96215S       | 1:1,000   |
| Rabbit anti-IRS-1                                                   | Cell Signaling              | 2382S        | 1:1,000   |
| Rabbit anti-Phospho-IRS-1 (Ser307)                                  | Cell Signaling              | 2381T        | 1:1,000   |
| Rabbit anti-JNK                                                     | Cell Signaling              | 9252s        | 1:2,000   |
| Rabbit anti-Phospho-JNK (T183/Y185)                                 | Cell Signaling              | 4668t        | 1:2,000   |
| Rabbit anti-PYGL                                                    | Proteintech                 | 15851-1-AP   | 1:2,000   |
| Rabbit anti-Phospho-PYGL (Ser15)                                    | Abcam                       | ab227043     | 1:2,000   |
| Rabbit anti p70 S6 Kinase (S6K)                                     | Cell Signaling              | 2708S        | 1:1,000   |
| Rabbit anti-Phospho-p70 S6 Kinase<br>(S6K) (T389)                   | Cell Signaling              | 9205S        | 1:1,000   |
| Peroxidase AffiniPure Goat Anti-Mouse<br>IgG                        | Jackson<br>ImmunoResearch   | 115-035-062  | 1:10,000  |
| Peroxidase AffiniPure Goat Anti-Rabbit<br>IgG                       | Jackson<br>ImmunoResearch   | 111-035-144  | 1:10,000  |
| <b>Cytokine neutralization</b>                                      |                             |              |           |
| Infliximab                                                          | Selleckchem                 | A2019        | 5 µg/ml   |
| Human IL-1 beta/IL-1F2 Antibody                                     | R&D Systems                 | MAB201-SP    | 0.2 µg/ml |

**Supplementary Table 3 | R software information and packages.**

| Package         | Version | Software       |
|-----------------|---------|----------------|
| annotate        | 1.68.0  | Bioconductor   |
| AnnotationDbi   | 1.52.0  | Bioconductor   |
| AnnotationForge | 1.32.0  | Bioconductor   |
| ash             | 1.0-15  | CRAN (R 4.0.2) |
| askpass         | 1.1     | CRAN (R 4.0.2) |
| assertthat      | 0.2.1   | CRAN (R 4.0.2) |
| beeswarm        | 0.4.0   | CRAN (R 4.0.2) |
| Biobase         | 2.50.0  | Bioconductor   |
| BiocFileCache   | 1.14.0  | Bioconductor   |
| BiocGenerics    | 0.36.1  | Bioconductor   |
| BiocManager     | 1.30.16 | CRAN (R 4.0.2) |
| BiocParallel    | 1.24.1  | Bioconductor   |
| biomaRt         | 2.46.3  | Bioconductor   |
| Biostrings      | 2.58.0  | Bioconductor   |
| bit             | 4.0.4   | CRAN (R 4.0.2) |
| bit64           | 4.0.5   | CRAN (R 4.0.2) |
| bitops          | 1.0-7   | CRAN (R 4.0.2) |
| blob            | 1.2.2   | CRAN (R 4.0.2) |
| brio            | 1.1.3   | CRAN (R 4.0.2) |
| cachem          | 1.0.6   | CRAN (R 4.0.2) |
| calibrate       | 1.7.7   | CRAN (R 4.0.2) |
| callr           | 3.7.0   | CRAN (R 4.0.2) |
| Category        | 2.56.0  | Bioconductor   |
| caTools         | 1.18.2  | CRAN (R 4.0.2) |
| cli             | 3.2.0   | CRAN (R 4.0.2) |
| cluster         | 2.1.2   | CRAN (R 4.0.2) |
| clusterProfiler | 3.18.1  | Bioconductor   |
| colorspace      | 2.0-3   | CRAN (R 4.0.2) |
| corrplot        | 0.92    | CRAN (R 4.0.2) |
| cowplot         | 1.1.1   | CRAN (R 4.0.2) |
| crayon          | 1.5.0   | CRAN (R 4.0.2) |
| curl            | 4.3.2   | CRAN (R 4.0.2) |
| data.table      | 1.14.2  | CRAN (R 4.0.2) |
| DBI             | 1.1.2   | CRAN (R 4.0.2) |
| dbplyr          | 2.1.1   | CRAN (R 4.0.2) |
| DelayedArray    | 0.16.3  | Bioconductor   |
| desc            | 1.4.1   | CRAN (R 4.0.2) |
| DESeq2          | 1.30.1  | Bioconductor   |
| devtools        | 2.4.3   | CRAN (R 4.0.2) |
| digest          | 0.6.29  | CRAN (R 4.0.2) |
| DO.db           | 2.9     | Bioconductor   |
| DOSE            | 3.16.0  | Bioconductor   |
| downloader      | 0.4     | CRAN (R 4.0.2) |
| dplyr           | 1.0.8   | CRAN (R 4.0.2) |
| ellipsis        | 0.3.2   | CRAN (R 4.0.2) |
| EnhancedVolcano | 1.8.0   | Bioconductor   |

|                  |         |                |
|------------------|---------|----------------|
| enrichplot       | 1.10.2  | Bioconductor   |
| extrafont        | 0.17    | CRAN (R 4.0.2) |
| extrafontdb      | 1       | CRAN (R 4.0.2) |
| fansi            | 1.0.2   | CRAN (R 4.0.2) |
| farver           | 2.1.0   | CRAN (R 4.0.2) |
| fastmap          | 1.1.0   | CRAN (R 4.0.2) |
| fastmatch        | 1.1-3   | CRAN (R 4.0.2) |
| fgsea            | 1.16.0  | Bioconductor   |
| fs               | 1.5.2   | CRAN (R 4.0.2) |
| gage             | 2.40.2  | Bioconductor   |
| gageData         | 2.28.0  | Bioconductor   |
| genefilter       | 1.72.1  | Bioconductor   |
| geneplotter      | 1.68.0  | Bioconductor   |
| generics         | 0.1.2   | CRAN (R 4.0.2) |
| GenomeInfoDb     | 1.26.7  | Bioconductor   |
| GenomeInfoDbData | 1.2.4   | Bioconductor   |
| GenomicRanges    | 1.42.0  | Bioconductor   |
| ggalt            | 0.4.0   | CRAN (R 4.0.2) |
| ggbeeswarm       | 0.6.0   | CRAN (R 4.0.2) |
| ggforce          | 0.3.3   | CRAN (R 4.0.2) |
| ggfun            | 0.0.5   | CRAN (R 4.0.2) |
| ggplot2          | 3.3.5   | CRAN (R 4.0.2) |
| ggraph           | 2.0.5   | CRAN (R 4.0.2) |
| ggrastr          | 1.0.1   | CRAN (R 4.0.2) |
| ggrepel          | 0.9.1   | CRAN (R 4.0.2) |
| glue             | 1.6.2   | CRAN (R 4.0.2) |
| GO.db            | 3.12.1  | Bioconductor   |
| GOSemSim         | 2.16.1  | Bioconductor   |
| GOstats          | 2.56.0  | Bioconductor   |
| gplots           | 3.1.1   | CRAN (R 4.0.2) |
| graph            | 1.68.0  | Bioconductor   |
| graphlayouts     | 0.8.0   | CRAN (R 4.0.2) |
| gridExtra        | 2.3     | CRAN (R 4.0.2) |
| GSEABase         | 1.52.1  | Bioconductor   |
| gtable           | 0.3.0   | CRAN (R 4.0.2) |
| gtools           | 3.9.2   | CRAN (R 4.0.2) |
| hms              | 1.1.1   | CRAN (R 4.0.2) |
| httr             | 1.4.2   | CRAN (R 4.0.2) |
| igraph           | 1.2.11  | CRAN (R 4.0.2) |
| IRanges          | 2.24.1  | Bioconductor   |
| KEGGgraph        | 1.50.0  | Bioconductor   |
| KEGGREST         | 1.30.1  | Bioconductor   |
| KernSmooth       | 2.23-20 | CRAN (R 4.0.2) |
| labeling         | 0.4.2   | CRAN (R 4.0.2) |
| lattice          | 0.20-45 | CRAN (R 4.0.2) |
| lifecycle        | 1.0.1   | CRAN (R 4.0.2) |
| limma            | 3.46.0  | Bioconductor   |
| locfit           | 1.5-9.4 | CRAN (R 4.0.2) |
| magrittr         | 2.0.2   | CRAN (R 4.0.2) |



|                  |          |                |
|------------------|----------|----------------|
| maps             | 3.4.0    | CRAN (R 4.0.2) |
| marray           | 1.68.0   | Bioconductor   |
| MASS             | 7.3-55   | CRAN (R 4.0.2) |
| Matrix           | 1.4-0    | CRAN (R 4.0.2) |
| MatrixGenerics   | 1.2.1    | Bioconductor   |
| matrixStats      | 0.61.0   | Bioconductor   |
| memoise          | 2.0.1    | CRAN (R 4.0.2) |
| munsell          | 0.5.0    | CRAN (R 4.0.2) |
| openssl          | 2.0.0    | CRAN (R 4.0.2) |
| org.Hs.eg.db     | 3.12.0   | Bioconductor   |
| pacman           | 0.5.1    | CRAN (R 4.0.2) |
| pathview         | 1.30.1   | Bioconductor   |
| pheatmap         | 1.0.12   | CRAN (R 4.0.2) |
| pillar           | 1.7.0    | CRAN (R 4.0.2) |
| pkgbuild         | 1.3.1    | CRAN (R 4.0.2) |
| pkgconfig        | 2.0.3    | CRAN (R 4.0.2) |
| pkgload          | 1.2.4    | CRAN (R 4.0.2) |
| plyr             | 1.8.6    | CRAN (R 4.0.2) |
| png              | 0.1-7    | CRAN (R 4.0.2) |
| polyclip         | 1.10-0   | CRAN (R 4.0.2) |
| prettyunits      | 1.1.1    | CRAN (R 4.0.2) |
| processx         | 3.5.2    | CRAN (R 4.0.2) |
| progress         | 1.2.2    | CRAN (R 4.0.2) |
| proj4            | 1.0-11   | CRAN (R 4.0.2) |
| ps               | 1.6.0    | CRAN (R 4.0.2) |
| purrr            | 0.3.4    | CRAN (R 4.0.2) |
| qvalue           | 2.22.0   | Bioconductor   |
| R.methodsS3      | 1.8.1    | CRAN (R 4.0.2) |
| R.oo             | 1.24.0   | CRAN (R 4.0.2) |
| R.utils          | 2.11.0   | CRAN (R 4.0.2) |
| R6               | 2.5.1    | CRAN (R 4.0.2) |
| ragg             | 1.2.2    | CRAN (R 4.0.2) |
| rappdirs         | 0.3.3    | CRAN (R 4.0.2) |
| RBGL             | 1.66.0   | Bioconductor   |
| RColorBrewer     | 1.1-2    | CRAN (R 4.0.2) |
| Rcpp             | 1.0.8.3  | CRAN (R 4.0.2) |
| RCurl            | 1.98-1.6 | CRAN (R 4.0.2) |
| RDAVIDWebService | 1.28.0   | Bioconductor   |
| remotes          | 2.4.2    | CRAN (R 4.0.2) |
| reshape2         | 1.4.4    | CRAN (R 4.0.2) |
| Rgraphviz        | 2.34.0   | Bioconductor   |
| rJava            | 1.0-6    | CRAN (R 4.0.2) |
| rlang            | 1.0.2    | CRAN (R 4.0.2) |
| rprojroot        | 2.0.2    | CRAN (R 4.0.2) |
| RSQLite          | 2.2.10   | CRAN (R 4.0.2) |
| rstudioapi       | 0.13     | CRAN (R 4.0.2) |
| Rtsne            | 0.15     | CRAN (R 4.0.2) |
| Rttf2pt1         | 1.3.10   | CRAN (R 4.0.2) |
| rvcheck          | 0.2.1    | CRAN (R 4.0.2) |

|                      |          |                |
|----------------------|----------|----------------|
| S4Vectors            | 0.28.1   | Bioconductor   |
| scales               | 1.1.1    | CRAN (R 4.0.2) |
| scatterpie           | 0.1.7    | CRAN (R 4.0.2) |
| sessioninfo          | 1.2.2    | CRAN (R 4.0.2) |
| shadowtext           | 0.1.1    | CRAN (R 4.0.2) |
| stringi              | 1.7.6    | CRAN (R 4.0.2) |
| stringr              | 1.4.0    | CRAN (R 4.0.2) |
| SummarizedExperiment | 1.20.0   | Bioconductor   |
| survival             | 3.3-1    | CRAN (R 4.0.2) |
| svglite              | 2.1.0    | CRAN (R 4.0.2) |
| systemfonts          | 1.0.4    | CRAN (R 4.0.2) |
| testthat             | 3.1.2    | CRAN (R 4.0.2) |
| textshaping          | 0.3.6    | CRAN (R 4.0.2) |
| tibble               | 3.1.6    | CRAN (R 4.0.2) |
| tidygraph            | 1.2.0    | CRAN (R 4.0.2) |
| tidyr                | 1.2.0    | CRAN (R 4.0.2) |
| tidyselect           | 1.1.2    | CRAN (R 4.0.2) |
| tweenr               | 1.0.2    | CRAN (R 4.0.2) |
| tximport             | 1.18.0   | Bioconductor   |
| usethis              | 2.1.5    | CRAN (R 4.0.2) |
| utf8                 | 1.2.2    | CRAN (R 4.0.2) |
| vctrs                | 0.3.8    | CRAN (R 4.0.2) |
| vipor                | 0.4.5    | CRAN (R 4.0.2) |
| viridis              | 0.6.2    | CRAN (R 4.0.2) |
| viridisLite          | 0.4.0    | CRAN (R 4.0.2) |
| withr                | 2.5.0    | CRAN (R 4.0.2) |
| XML                  | 3.99-0.9 | CRAN (R 4.0.2) |
| xml2                 | 1.3.3    | CRAN (R 4.0.2) |
| xtable               | 1.8-4    | CRAN (R 4.0.2) |
| XVector              | 0.30.0   | Bioconductor   |
| yulab.utils          | 0.0.4    | CRAN (R 4.0.2) |
| zlibbioc             | 1.36.0   | Bioconductor   |

**Supplementary Table 4 | P values of statistically significant results.**

| Figure              | Panel                      | Condition                                                                                                                    | P value                                                     |
|---------------------|----------------------------|------------------------------------------------------------------------------------------------------------------------------|-------------------------------------------------------------|
| <b>Main Figures</b> |                            |                                                                                                                              |                                                             |
| 1a                  |                            | I vs. G (60 min)<br>I vs. G (120 min)<br>I vs. G (180 min)                                                                   | 0.0004<br><0.0001<br>0.0208                                 |
| 1c                  | <i>PCK1</i>                | C vs. G<br>I vs. G<br>G vs. G+I                                                                                              | 0.0076<br>0.0027<br>0.0255                                  |
|                     | <i>G6PC</i>                | C vs. G<br>C vs. G+I<br>I vs. G<br>G vs. G+I                                                                                 | <0.0001<br>0.0282<br><0.0001<br>0.0003                      |
|                     | <i>GCK</i>                 | C vs. I<br>C vs. G+I<br>I vs. G<br>G vs. G+I                                                                                 | 0.0480<br>0.0248<br>0.0170<br>0.0091                        |
| 1d                  | pAKT(T308)/AKT             | 10 min<br>20 min<br>30 min                                                                                                   | 0.0454<br>0.0327<br>0.0051                                  |
|                     | pAKT(S473)/AKT             | 20 min<br>30 min                                                                                                             | 0.0350<br>0.0295                                            |
|                     | pS6K1(T389)/S6K1           | 15 min<br>30 min                                                                                                             | 0.0075<br>0.0210                                            |
|                     | pPYGL(S15)/PYGL            | 30 min                                                                                                                       | 0.0355                                                      |
| 1e                  |                            | G vs. I                                                                                                                      | 0.0239                                                      |
| 2b                  | LDH                        | M1 vs. M0<br>M1 vs. C                                                                                                        | 0.0203<br>0.0052                                            |
|                     | Cl. caspase 3              | M1 vs. M0<br>M1 vs. C                                                                                                        | 0.0007<br>0.0004                                            |
| 2c                  | WTC<br>pJNK(T183/Y185)     | M1 vs. M0<br>M1 vs. C                                                                                                        | 0.0010<br>0.0005                                            |
|                     | CW10030<br>pJNK(T183/Y185) | M1 vs. M0<br>M1 vs. C                                                                                                        | 0.0245<br>0.0035                                            |
|                     |                            |                                                                                                                              |                                                             |
| 2d                  | WTC IL1 $\beta$            | M1 vs. M0<br>M1 vs. C                                                                                                        | 0.0005<br>0.0001                                            |
|                     | WTC TNF $\alpha$           | M1 vs. M0<br>M1 vs. C                                                                                                        | 0.0049<br>0.0046                                            |
|                     | CW10030 IL1 $\beta$        | M1 vs. M0<br>M1 vs. C                                                                                                        | <0.0001<br><0.0001                                          |
|                     | CW10030 TNF $\alpha$       | M1 vs. M0<br>M1 vs. C                                                                                                        | 0.0026<br>0.0021                                            |
| 2e                  |                            | M1 v. M0 (30 min)<br>M1 vs. C (30 min)<br>M1 v. M0 (60 min)<br>M1 vs. C (60 min)<br>M1 v. M0 (120 min)<br>M1 vs. C (120 min) | 0.0034<br><0.0001<br>0.0037<br><0.0001<br>0.0050<br><0.0001 |
| 2f                  | pAKT(T308)/AKT             | M1 vs. M0                                                                                                                    | 0.0009                                                      |

|    |                 |                                                                                                                                                                                                                                                                                                                                            |                                                                     |
|----|-----------------|--------------------------------------------------------------------------------------------------------------------------------------------------------------------------------------------------------------------------------------------------------------------------------------------------------------------------------------------|---------------------------------------------------------------------|
|    |                 | M1 vs. C                                                                                                                                                                                                                                                                                                                                   | 0.0134                                                              |
|    | pAKT(S473)/AKT  | M1 vs. M0<br>M1 vs. C                                                                                                                                                                                                                                                                                                                      | 0.0017<br>0.0148                                                    |
|    | pPYGL(S15)/PYGL | M1 vs. M0<br>M1 vs. C                                                                                                                                                                                                                                                                                                                      | 0.0122<br>0.0475                                                    |
| 2g | G6PC            | M1 vs. M0<br>M1 vs. C                                                                                                                                                                                                                                                                                                                      | 0.0440<br>0.0281                                                    |
|    | PCK1            | M1 vs. M0<br>M1 vs. C                                                                                                                                                                                                                                                                                                                      | 0.0009<br>0.0009                                                    |
|    | GCK             | M1 vs. M0<br>M1 vs. C                                                                                                                                                                                                                                                                                                                      | 0.0136<br>0.0008                                                    |
| 2h |                 | C vs. N                                                                                                                                                                                                                                                                                                                                    | 0.0006                                                              |
| 4b |                 | M1 vs. M1+anti-TNF $\alpha$<br>M1 vs. M1+anti-TNF $\alpha$ +anti-IL1 $\beta$                                                                                                                                                                                                                                                               | 0.0024<br>0.0003                                                    |
| 4c |                 | M1 vs. M1+anti-IL1 $\beta$<br>M1 vs. M1+anti-TNF $\alpha$ +anti-IL1 $\beta$                                                                                                                                                                                                                                                                | 0.0187<br>0.0282                                                    |
| 4d |                 | M1 vs. M1+anti-IL1 $\beta$ (30 min)<br>M1 vs. M1+anti-TNF $\alpha$ +anti-IL1 $\beta$ (30 min)<br>M1 vs. M1+anti-IL1 $\beta$ (60 min)<br>M1 vs. M1+anti-TNF $\alpha$ +anti-IL1 $\beta$ (60 min)<br>M1 vs. M1+anti-TNF $\alpha$ (120 min)<br>M1 vs. M1+anti-IL1 $\beta$ (120 min)<br>M1 vs. M1+anti-TNF $\alpha$ +anti-IL1 $\beta$ (120 min) | 0.0039<br>0.0002<br>0.0009<br>0.0027<br>0.0017<br>0.0179<br><0.0001 |
| 4e | pAKT(T308)/AKT  | M1 vs. M1+anti-TNF $\alpha$ +anti-IL1 $\beta$                                                                                                                                                                                                                                                                                              | 0.0073                                                              |
|    | pAKT(S473)/AKT  | M1 vs. M1+anti-TNF $\alpha$ +anti-IL1 $\beta$                                                                                                                                                                                                                                                                                              | 0.0273                                                              |
| 4f | PCK1            | M1 vs. M1+anti-TNF $\alpha$ +anti-IL1 $\beta$                                                                                                                                                                                                                                                                                              | 0.0284                                                              |
|    | G6PC            | M1 vs. M1+anti-TNF $\alpha$<br>M1 vs. M1+anti-TNF $\alpha$ +anti-IL1 $\beta$                                                                                                                                                                                                                                                               | 0.0070<br>0.0125                                                    |
|    | GCK             | M1 vs. M1+anti-TNF $\alpha$<br>M1 vs. M1+anti-IL1 $\beta$<br>M1 vs. M1+anti-TNF $\alpha$ +anti-IL1 $\beta$                                                                                                                                                                                                                                 | 0.0361<br>0.0037<br>0.0055                                          |
| 4g | pPYGL(S15)/PYGL | M1 vs. M1+anti-TNF $\alpha$ +anti-IL1 $\beta$                                                                                                                                                                                                                                                                                              | 0.0091                                                              |
| 5a | IL1 $\beta$     | M1 vs. M0<br>M1 vs. C                                                                                                                                                                                                                                                                                                                      | 0.0261<br>0.0069                                                    |
|    | TNF $\alpha$    | M1 vs. M0<br>M1 vs. C                                                                                                                                                                                                                                                                                                                      | <0.0001<br><0.0001                                                  |
| 5c | JUN             | M1 vs. M0<br>M1 vs. C<br>M1 vs. M1+NAbs                                                                                                                                                                                                                                                                                                    | <0.0001<br><0.0001<br>0.0142                                        |
|    | CASP1           | M1 vs. M0<br>M1 vs. C                                                                                                                                                                                                                                                                                                                      | <0.0001<br><0.0001                                                  |
|    | NFKB2           | M1 vs. M0<br>M1 vs. C<br>M1 vs. M1+NAbs                                                                                                                                                                                                                                                                                                    | 0.0001<br>0.0002<br>0.0005                                          |
|    | TNF             | M1 vs. M0<br>M1 vs. C<br>M1 vs. M1+NAbs                                                                                                                                                                                                                                                                                                    | <0.0001<br><0.0001<br>0.0235                                        |
| 5d | Primary cells   | M1 vs. C<br>M1 vs. M1+NAbs                                                                                                                                                                                                                                                                                                                 | 0.0279<br>0.0020                                                    |

|                       |                                           |                                                           |                                                 |
|-----------------------|-------------------------------------------|-----------------------------------------------------------|-------------------------------------------------|
|                       | CW10030 iPSC-derived cells                | M1 vs. C<br>M1 vs. M1+NAbs                                | 0.0016<br>0.0066                                |
| 5e                    | Primary cells pAKT(S473)/AKT              | M1 vs. C<br>M1 vs. M1+NAbs                                | 0.0063<br>0.0020                                |
|                       | CW10030 iPSC-derived cells pAKT(S473)/AKT | M1 vs. C<br>M1 vs. M1+NAbs                                | 0.0435<br>0.0085                                |
| 5f                    | Primary cells <i>PCK1</i>                 | M1 vs. C<br>M1 vs. M1+NAbs                                | 0.0042<br>0.0057                                |
|                       | Primary cells <i>GCK</i>                  | M1 vs. C<br>M1 vs. M1+NAbs                                | 0.0458<br>0.0164                                |
|                       | CW10030 iPSC-derived cells <i>PCK1</i>    | M1 vs. C<br>M1 vs. M1+NAbs                                | 0.0389<br>0.0096                                |
|                       | CW10030 iPSC-derived cells <i>GCK</i>     | M1 vs. C<br>M1 vs. M1+NAbs                                | 0.0306<br>0.0232                                |
| Supplementary Figures |                                           |                                                           |                                                 |
| 2a                    |                                           | C vs. I (30 min)                                          | 0.0336                                          |
| 2b                    | <i>INSR</i>                               | C vs. I<br>C vs. G<br>C vs. G+I<br>I vs. G+I<br>G vs. G+I | 0.0010<br>0.0008<br><0.0001<br>0.0338<br>0.0459 |
|                       |                                           | <i>IRS1</i>                                               | C vs. G<br>C vs. G+I<br>I vs. G+I               |
|                       | <i>IRS2</i>                               | C vs. I<br>C vs. G<br>C vs. G+I<br>I vs. G+I<br>G vs. G+I | 0.0015<br>0.0025<br><0.0001<br>0.0032<br>0.0019 |
| 2c                    | pY/INSR                                   | 5 min<br>15 min<br>30 min                                 | 0.0006<br>0.0005<br>0.0002                      |
| 3d                    | <i>CASP1</i>                              | M1 vs. M0<br>M1 vs. C                                     | <0.0001<br><0.0001                              |
|                       | <i>CASP4</i>                              | M1 vs. M0<br>M1 vs. C                                     | <0.0001<br><0.0001                              |
|                       | <i>CASP5</i>                              | M1 vs. M0<br>M1 vs. C                                     | <0.0001<br><0.0001                              |
| 3e                    | WTC <i>NFKB2</i>                          | M1 vs. M0<br>M1 vs. C                                     | <0.0001<br><0.0001                              |
|                       | WTC <i>TNF</i>                            | M1 vs. M0<br>M1 vs. C                                     | <0.0001<br><0.0001                              |
|                       | CW10030 <i>NFKB2</i>                      | M1 vs. M0<br>M1 vs. C                                     | 0.0176<br>0.0055                                |
|                       | CW10030 <i>TNF</i>                        | M1 vs. M0<br>M1 vs. C                                     | <0.0001<br><0.0001                              |
| 4d                    | <i>IRS1</i>                               | M1 vs. M0<br>M1 vs. C                                     | 0.0017<br>0.0039                                |
|                       | <i>IRS2</i>                               | M1 vs. M0                                                 | 0.0028                                          |

|    |                                               |                                                                                                            |                               |
|----|-----------------------------------------------|------------------------------------------------------------------------------------------------------------|-------------------------------|
|    |                                               | M1 vs. C                                                                                                   | 0.0005                        |
| 4e |                                               | M1 vs. M0<br>M1 vs. C                                                                                      | 0.0340<br>0.0014              |
| 4f |                                               | M1 vs. M0<br>M1 vs. C                                                                                      | 0.0416<br>0.0072              |
| 4h |                                               | M1 vs. M0<br>M1 vs. C                                                                                      | 0.0411<br>0.0349              |
| 4j |                                               | L vs. C                                                                                                    | 0.0005                        |
| 6a | <i>TNF</i>                                    | M1 vs. M1+anti-TNF $\alpha$<br>M1 vs. M1+anti-TNF $\alpha$ +anti-IL1 $\beta$                               | 0.0309<br>0.0002              |
| 6c | <i>IRS1</i>                                   | M1 vs. M1+anti-TNF $\alpha$<br>M1 vs. M1+anti-IL1 $\beta$                                                  | 0.0315<br>0.0199              |
|    | <i>IRS2</i>                                   | M1 vs. M1+anti-TNF $\alpha$<br>M1 vs. M1+anti-IL1 $\beta$<br>M1 vs. M1+anti-TNF $\alpha$ +anti-IL1 $\beta$ | <0.0001<br><0.0001<br><0.0001 |
| 7a |                                               | C 2h vs. M1 2h                                                                                             | 0.0151                        |
| 7b |                                               | M1 vs. C<br>M1 vs. M1+NAbs                                                                                 | 0.0064<br>0.0067              |
| 7c | CW10030 iPSC-derived cells<br>pPYGL(S15)/PYGL | M1 vs. C<br>M1 vs. M1+NAbs                                                                                 | 0.0304<br>0.0026              |
| 7d |                                               | M1 vs. C                                                                                                   | 0.0376                        |
