# Supplementary material for: Modeling and therapeutic targeting of inflammation-induced hepatic insulin resistance using human iPSC-derived hepatocytes and macrophages
Source: PubMed Central journal article supplement (PMC10318012; doi:10.1038/s41467-023-39311-w), 2023-07-03
Supplement: 41467_2023_39311_MOESM3_ESM.pdf [file 41467_2023_39311_MOESM3_ESM.pdf]

## **Description of Additional Supplementary Files**

File Name: Supplementary Data 1

Description: Processed RNAseq data
